# Supplementary material for: Suprascapular neuropathy in the setting of rotator cuff tears: study protocol for a double-blinded randomized controlled trial
Source: Trials. 2016 Nov 22;17:554. doi: 10.1186/s13063-016-1672-y (PMC5120427; doi:10.1186/s13063-016-1672-y)
Supplement: Additional file 2: Table S1. — Patient forms which will contain preoperative and postoperative clinical signs and brief outcomes of neurophysiological and imaging studies. (PDF 667 kb) [file 13063_2016_1672_MOESM2_ESM.pdf]

**Table S1:** Patient forms which will contain preoperative and postoperative clinical signs, brief outcomes of neurophysiological and imaging studies.

PATIENT FORM

Allocation/Number:

INCLUSION DATE: \_\_\_\_\_

OPERATION DATE: \_\_\_\_\_

NAME/SURNAME:

GENDER:

AGE:

DIAGNOSIS (MENTION SIZE OF CUFF TEAR):

RELATED SHOULDER PROBLEMS (E.G: IMPINGEMENT, A/C JOINT PAIN, INSTABILITY)

DATE OF DIAGNOSIS ESTABLISHMENT IF DIFFERENT FROM INCLUSION DATE:

| CLINICAL SIGNS                                        | PREOPERATIVELY | 6 MONTHS POST-OP | 12 MONTHS POST-OP |
|-------------------------------------------------------|----------------|------------------|-------------------|
| HORNBLOWER SIGN                                       |                |                  |                   |
| DROPPING SIGN                                         |                |                  |                   |
| JOBE SIGN                                             |                |                  |                   |
| NEER SIGN                                             |                |                  |                   |
| HAWKIN'S SIGN                                         |                |                  |                   |
| LAG SIGN                                              |                |                  |                   |
| ABDUCTION                                             |                |                  |                   |
| FORWARD ELEVATION                                     |                |                  |                   |
| INTERNAL ROTATION                                     |                |                  |                   |
| EXTERNAL ROTATION                                     |                |                  |                   |
| SUPRASCAPULAR SENSORY FUNCTION (0,1,2), REGIONAL PAIN |                |                  |                   |
| <b>POWER</b>                                          |                |                  |                   |
| SUPRASPINATUS                                         |                |                  |                   |
| SUBSCAPULARIS                                         |                |                  |                   |
| INFRASPINATUS                                         |                |                  |                   |
| TERES MINOR                                           |                |                  |                   |
| ATROPHY                                               |                |                  |                   |
| CONSTANT SCORE                                        |                |                  |                   |
| SPADI SCORE                                           |                |                  |                   |
| ASES SCORE                                            |                |                  |                   |
| DASH SCORE                                            |                |                  |                   |

|                                     |                                   |
|-------------------------------------|-----------------------------------|
| OP MRI FINDINGS AND DATE:           | PRE- OP NC/EMG FINDINGS AND DATE: |
| TWELVE MONTHS POST-OP MRI FINDINGS: | SIX MONTHS NC/EMG FINDINGS:       |
|                                     | 12 MONTHS NC/EMG FINDINGS:        |
